# Supplementary material for: Evidence of centromeric histone 3 chaperone involved in DNA damage repair pathway in budding yeast
Source: eLife. 2025 Dec 10;14:e104431. doi: 10.7554/eLife.104431 (PMC12695027; doi:10.7554/eLife.104431)
Supplement: Figure 1—figure supplement 2—source data 3. [file elife-104431-fig1-figsupp2-data3.xlsx]

## Sheet: B
			% of cells
			G1	M	Arrested	Anaphase
		SCM3	23.9316	35.0427	11.1111	29.9145
		SCM3-AID	10.2941	7.35294	75	7.35294

## Sheet: E
				% of cell viability
				Wild-type			scm3-AID			rad52Δ
				41	45	51	24	22	28	1	6	10
