# Supplementary material for: Evidence of centromeric histone 3 chaperone involved in DNA damage repair pathway in budding yeast
Source: eLife. 2025 Dec 10;14:e104431. doi: 10.7554/eLife.104431 (PMC12695027; doi:10.7554/eLife.104431)
Supplement: Figure 1—source data 1. [file elife-104431-fig1-data1.xlsx]

## Sheet: 1B
						% of cell viability
						SCM3-AID	SCM3-AID + MMS	SCM3-AID + Auxin	SCM3-AID + Aux + MMS
						100	92	34	18
						100	98	52	16
						100	90	36	22
