# Supplementary material for: Evidence of centromeric histone 3 chaperone involved in DNA damage repair pathway in budding yeast
Source: eLife. 2025 Dec 10;14:e104431. doi: 10.7554/eLife.104431 (PMC12695027; doi:10.7554/eLife.104431)
Supplement: Figure 2—figure supplement 1—source data 1. [file elife-104431-fig2-figsupp1-data1.xlsx]

## Sheet: B
					% of Rad52-GFP foci
					DMSO			DMSO + Auxin
				% Foci	8.3	4	8.5	10.3	6	9.43

## Sheet: C
				Hours	SCM3-AID			SCM3-AID + Auxin
				1	49.1228	42.3729	60.3448	12.766	18.75	19.5122
				2	33.3333	22.0339	20.6897	22.3404	17.8571	21.9512
				3	10.5263	11.8644	13.7931	26.5957	25	30.4878
				4	7.01754	23.7288	5.17241	38.2979	38.3929	28.0488
