# Supplementary material for: Evidence of centromeric histone 3 chaperone involved in DNA damage repair pathway in budding yeast
Source: eLife. 2025 Dec 10;14:e104431. doi: 10.7554/eLife.104431 (PMC12695027; doi:10.7554/eLife.104431)
Supplement: Figure 2—figure supplement 2—source data 1. [file elife-104431-fig2-figsupp2-data1.xlsx]

## Sheet: C
							% of Rad52-GFP foci
						Mins	SCM3-AID			SCM3-AID + Auxin
						0	6.616	7.843	7.5	9.2308	9.278	8.41121
						30	6.9565	7.93	8.5	10.843	10.1695	10
						60	7.874	8.16	8.98	24.348	21.1268	23.4568
						90	7.8431	6.45	8.65385	20.43	17.5	18.0328
						120	7.7586	6.25	9.9154	14.53	12.8205	9.90991

## Sheet: D
						% of Rad52-GFP foci
					Mins	SCM3-AID			SCM3-AID + Auxin
					0	6.6116	7.84314	7.5	9.2308	9.27835	8.41121
					30	10.465	16.07	14.2857	25.547	28.125	29.5181
					60	20.833	20.1923	14.2857	55.556	35.1743	35.1351
					90	13.971	14.6341	12.5	21.519	15.7895	15.3154
					120	14	14.9425	7.826	17.105	19.4805	13.245

## Sheet: E
						% of PI positive cells
						SCM3-AID	SCM3-AID + Auxin	SCM3-AID + MMS	SCM3-AID + Auxin + MMS
						4.23729	16.9811	27.8689	36.8421
						5.50459	12	27.2727	33.3333
						3.15789		26.1538	34.6154
