# Supplementary material for: Evidence of centromeric histone 3 chaperone involved in DNA damage repair pathway in budding yeast
Source: eLife. 2025 Dec 10;14:e104431. doi: 10.7554/eLife.104431 (PMC12695027; doi:10.7554/eLife.104431)
Supplement: Figure 2—source data 1. [file elife-104431-fig2-data1.xlsx]

## Sheet: 2C
					% of Rad52-GFP foci
					SCM3-AID			SCM3-AID + Auxin
				no MMS	4.2735	4.8	7.25806	14.8936	12.5	10.7143
				0.02% MMS	44.186	56.2044	50.4065	73.2143	69.863	71.134

## Sheet: 2D
				% of Rad52-GFP foci
				SCM3-AID			SCM3-AID + Auxin
			0.02% MMS	1.75	2.16	1.63793	2.9	2.83	2.67073
