# Supplementary material for: Evidence of centromeric histone 3 chaperone involved in DNA damage repair pathway in budding yeast
Source: eLife. 2025 Dec 10;14:e104431. doi: 10.7554/eLife.104431 (PMC12695027; doi:10.7554/eLife.104431)
Supplement: Figure 3—source data 1. [file elife-104431-fig3-data1.xlsx]

## Sheet: B
			Intensity
			Scm3	Scm3 + MMS	Ndc10	Ndc10 MMS
			3439	34402.5	6851	6044.5
			4791.5	33603	2496.5	6512.5
			5236.5	33544	3746.5	6628
			5592	33020	12875.5	6920
			5653.5	32705.5	12444	7263.5
			6823.5	32253	5927.5	7620.5
			7530.5	31394.5	12689.5	7901.5
			7825	31199.5	9196	8022
			8615.5	28909	8108	8042
			9578	28889.5	5781.5	8138.5
			9847.5	27586	10241	8293.5
			10533	26549.5	9651	8411.5
			10964.5	25571	14135	9143.5
			12110.5	23776.5	10346	9264.5
			12142	23027.5	16946	9707.5
			12761	22986	10376.5	10757.5
			13254	22974.5	12835.5	11134.5
			15948.5	21703.5	19786.5	11383.5
			16243.5	20652	17040.5	11395
			16371	20494	21749.5	11412
			17997	20372.5	12517.5	12409.5
			18668.5	20090.5	10447	12996.5
			19065	19336	8203	13080
			19602	18902.5	16808.5	13206
			20463.5	17261	26669	13272
			20675.5	15909.5	11823	13693
			21419	15284.5	11030	14559.5
			21647.5	14916.5	24103	14703
			24444.5	14194	6235	16108.5
			25756.5	12926.5	33379	17914
			27688.5	12799	18217	18173
			27841	12685	10876.5	18294
			29359	12255	14338	18371.5
			30006.5	11720.5	8404	19334
			31156.5	11105	14435	19451.5
			31398.5	10973	12956.5	19965
			31669	10506	19363.5	20354
			33516.5	10432.5	22054	20421
			35394.5	9570	9379	21210.5
			38853	9220	14846.5	22451
			44994.5	7966	31773	22780.5
			52046.5	6339.5	24861.5	26399.5
				34631.5		6032
				36572.5		5837
				37185		4964
				38766.5		4895.5
				45288.5		4611
				48975		4320
				50742		3416
				54027.5
				54592
				55900
				65948.5
				68464.5

## Sheet: C
				Mean Intensity
				Scm3	Scm3+MMS	Ndc10	Ndc10 + MMS
				15531.4	24281.9	14979.9	10018.6
				22356.7	29641.5	11151.9	14762.2
				20268.1	31872.3	16163.9	9423.47
