# Supplementary material for: Evidence of centromeric histone 3 chaperone involved in DNA damage repair pathway in budding yeast
Source: eLife. 2025 Dec 10;14:e104431. doi: 10.7554/eLife.104431 (PMC12695027; doi:10.7554/eLife.104431)
Supplement: Figure 4—figure supplement 1—source data 1. [file elife-104431-fig4-figsupp1-data1.xlsx]

## Sheet: B
		Intensity y-H2A
		Untreated	Treated
		19173.5	23612
		34114.5	14427
		10741	29795.5
		10534	22551.5
		21711.5	11048
		6508.5	35460.5
		5316	16896.5
		8991	21539
		21427	27741.5
		9556.5	25522.5
		22679.5	28829.5
		3479	21486.5
		8303	10909.5
		27218	45906
		15089	14550.5
		18175.5	13298.5
		12776.5	60066.5
		10229.5	38304
		15237	32722
		30961	16137
		7927.5	18018.5
		8791.5	37249.5
		2557.5	41240
		6852.5	27423.5
		16478.5	43109.5
		2619	10993.5
		4085.5	14442.5
		2750.5	41850.5
		11004	39612
		7016	25931.5
		20020	43748
		2696	23295.5
		4682	46365
		22148	62387
		8335	33923.5
		28115.5	13220.5
		9853.5	27602
		8849	44186
		21492	30797.5

## Sheet: C
			Mean intensity y-H2A
			Untreated	Treated
			14982.4	22293.8
			11037.9	29698.1
			13110.1	35883.9

## Sheet: E
		PCC values Rad52- y-H2A
		no mms	0.02% MMS
		0.111	0.04
		0.101	0.04
		0.11411	0.08
		0.36124	0.11047
		0.1789	0.14059
		0.18407	0.16551
		0.19402	0.16798
		0.243	0.17797
		0.32808	0.18689
		0.23919	0.19039
		0.24701	0.21448
		0.1619	0.21665
		0.282056	0.24455
		0.42676	0.24611
		0.17483	0.2466
		0.33619	0.25305
		0.13015	0.25699
		0.29406	0.25703
		0.16169	0.26791
		0.32533	0.27154
		0.06	0.28381
		0.1647	0.28819
		0.28922	0.31254
		0.127	0.31515
		0.79492	0.31953
		0.10802	0.32615
		0.1011	0.32727
		0.13492	0.33887
		0.34032	0.34229
		0.16539	0.34332
		0.38665	0.3519
		0.43161	0.36009
		0.24018	0.36118
		0.31317	0.3702
		0.2168	0.37306
		0.28537	0.38997
		0.06	0.39199
		0.1482	0.39208
		0.2218	0.40332
		0.02	0.43969
		0.13916	0.44314
		0.4453	0.45609
		0.103	0.46245
		0.34028	0.47866
		0.37861	0.49208
		0.09	0.51162
		0.04	0.52274
		0.3546	0.52669
		0.1043	0.66771
		0.18565	0.68079
		0.0453	0.702886
		0.2011	0.79789
		0.25757
		0.26057
		0.18148
		0.13259
		0.299915
		0.14655
		0.12526
		0.2185
		0.27381
		0.0181

## Sheet: F
		Mean PCC values Rad52- y-H2A
		Untreated			Treated
		0.215862	0.252307	0.189637	0.375113	0.326073	0.311872

## Sheet: H
						PCC values Scm3- y-H2A
						no mms	0.02% MMS
						0.0009
						0.0041	0.0024
						0.0048	0.0024
						0.0296	0.0038
						0.0311	0.0049
						0.0397	0.0051
						0.0436	0.0104
						0.0547	0.0109
						0.0561	0.011
						0.0568	0.016
						0.0587	0.0323
						0.0617	0.0409
						0.0621	0.0792
						0.0632	0.0882
						0.064	0.0926
						0.0649	0.0987
						0.0698	0.101
						0.07402	0.1044
						0.0822	0.113
						0.0841	0.1175
						0.1038	0.1237
						0.1038	0.1469
						0.1117	0.1503
						0.1143	0.1604
						0.1148	0.2051
						0.1158	0.2099
						0.134	0.2115
						0.1393	0.2125
						0.14	0.2176
						0.1534	0.2215
						0.1586	0.2225
						0.1657	0.2901
						0.1955	0.2962
						0.1991	0.3009
						0.2113	0.3233
						0.2349	0.345
						0.24	0.3699
						0.2424	0.3783
						0.2426	0.3791
						0.2665	0.3864
						0.288	0.431
						0.299	0.4699
						0.3002	0.4992
						0.3117	0.5
						0.3321	0.5368
						0.3459	0.5585
						0.35	0.5663
						0.4198	0.6237
						0.5891	0.646
						0.6451	0.6973
						0.8985	0.7021

## Sheet: I
				Mean PCC values Scm3- y-H2A
				Untreated			Treated
				0.1454	0.0693	0.0298	0.2171	0.0706	0.0297

## Sheet: K
							Intensity Scm3-Myc
							wt	mec1 ∆ tel1∆ sml1∆
							120879	20583.5
							36367	38483
							172198	11526.5
							23113	15054
							84723	60981
							55321	63328
							55771	19290.5
							18733	23648.5
							89336	15935.5
							83365	73215.5
							97778	61040.5
							10745	40797.5
							15873	24050
							18746	37256
							15684	45962.5
							9898	87093.5
							36188	49081
							18173	31743.5
							113361	61685
							197299	117642
							103515	56288
							65937	105844
							22191	89864.5
							75182	89832
							11017	70561
							143007	16102
							70265	34701.5
							55839	51102
							110793	133318
							279794	42009
							26979	4155
							52686	16187.5
							53738	4518.5
							18575	11134.5
							42404	17757
							72507	20673
							54799	86030
							22239	18129
							50423	46963.5
							61282	28097.5
							170376	482938
							112272	119878
							38258.5	64627
							22570	140060
							72566.5	44717.5
							113402	30908
							121921	35400
							139206	59719.5
							84091	24015
							140029	42214
							122485	17250.5
							32438.5	56234
							34315	149170
							361932	20396.5
							45212	71313.5
							187565	104638
							43621	74776
							112031	25294.5
							12482.5	71251
							178340	41014
							126322	75803
							369054	8297.5
							273012	17600.5
							109688	40355
							69063	17734.5
							129135	1879
							116279	46069.5
							31423	52532
							223860	34646
							23450	21060
							41397.5	301640
							210376	79909
							58341	131806
							155286	3876.5
							38809.5	8723
							86829.5	26094
							65496	157112
							89519	80940
							74771	140950
							49390.5	52558.5
							646520	51647
							43269	30065.5
							6516	24019.5
							11435	33825.5
							53320	112420
							45777	112492
							49411	229410
							16877.5	211876
							35694	117354
							7491	523987
							9949	8690.5
							36227	23320
							98826	6505
							117133	17521
							51169	34785
							41878	125576
							85808	98707.5
							74843	40656
							163640	65561
							147587	46607

## Sheet: L
								Mean intensity Scm3-Myc
								wt			mec1 ∆ tel1∆ sml1∆
								87119.6	120547	66667.9	96621.1	66393.1	46041.6
