# Supplementary material for: Evidence of centromeric histone 3 chaperone involved in DNA damage repair pathway in budding yeast
Source: eLife. 2025 Dec 10;14:e104431. doi: 10.7554/eLife.104431 (PMC12695027; doi:10.7554/eLife.104431)
Supplement: Figure 4—figure supplement 2—source data 1. [file elife-104431-fig4-figsupp2-data1.xlsx]

## Sheet: B
					No of foci
					Untreated	Heat shock
					9	14
					9	13
					8	13
					8	13
					8	13
					8	13
					7	12
					7	11
					7	11
					7	11
					7	11
					6	11
					6	9
					6	9
					6	9
					6	9
					6	9
					6	9
					5	8
					5	8
					5	8
					5	8
					5	8
					5	8
					5	8
					4	8
					4	8
					4	7
					4	7
					4	7
					4	7
					4	7
					4	7
					4	7
					4	7
					4	7
					4	7
					4	7
					4	7
					3	7
					3	7
					3	6
					3	6
					3	6
					3	6
					3	6
					3	6
					3	6
					3	6
					3	6
					3	6
					3	5
					3	5
					3	5
					3	5
					3	5
					3	5
					3	5
					3	5
					2	5
					2	5
					2	5
					2	5
					2	5
					2	4
					2	4
					2	4
					2	4
					2	4
					2	4
					2	4
					2	4
					2	4
					2	4
					2	4
					2	4
					1	4
					1	4
					1	4
					1	4
					1	4
					1	4
					1	4
					1	4
					1	3
					1	3
					1	3
					1	3
					1	3
					1	3
					1	3
					1	3
					1	3
					1	3
					1	3
					1	3
					1	3
						3
						3
						3
						2
						2
						2

## Sheet: C
				No of foci
				Untreated	Heat shock
				3.11429	6.26471
				3.53846	6.08824
				3.66667	5.97143

## Sheet: E
				PCC
				Untreated	Heat shock	MMS treated
				0.09	0.59984	0.35317
				0.20827	0.69064	0.07
				0.08	0.30499	0.71
				0.48751	0.00877	0.7167
				0.01	0.14785	0.34298
				0.14139	0.39881	0.0158
				0.58993	0.64729	0.465
				0.05	0.5099	0.4435
				0.22196	0.2869	0.37077
				0.66982	0.27913	0.20935
				0.39999	0.25539	0.46442
				0.36477	0.21835	0.28707
				0.19413	0.20913	0.052
				0.44948	0.49742	0.36882
				0.23772	0.07303	0.75479
				0.35388	0.48335	0.58016
				0.35811	0.35018	0.33924
				0.15378	0.21107	0.28382
				0.2632	0.07539	0.22327
				0.6912	0.34818	0.276
				0.19218	0.24586	0.09949
				0.15259	0.35384	0.41398
				0.34092	0.07796	0.85976
				0.4919	0.31436	0.03
				0.385009	0.42761	0.44638
				0.42125	0.35603	0.03247
				0.32413	0.59531	0.017
				0.35506	0.00389	0.26474
				0.218332	0.22418	0.24108
				0.52252	0.1725	0.07
				0.28091	0.60154	0.1
				0.13627	0.18337	0.3315
				0.19052	0.17144	0.15149
				0.465532	0.4342	0.49494
				0.53365	0.08611	0.23691
				0.03	0.33091	0.08885
				0.24847	0.23337	0.22474
				0.52302	0.16269	0.06
				0.04	0.56749	0.4722
				0.151014	0.14351	0.2457
				0.27386	0.16617	0.1606
				0.21201	0.40106	0.07
				0.127	0.52704	0.32925
				0.18719	0.16829	0.25727
				0.14528	0.20231	0.0778
				0.27324	0.15374	0.1179
				0.50481	0.2472	0.1818
				0.26933	0.41428	0.49912
				0.43851	0.00378	0.83211
				0.06	0.29538	0.02
				0.19781	0.66404	0.2437
				0.57809	0.1853	0.02
				0.08722	0.34184	0.04
				0.07594	0.46432	0.03
				0.19991	0.47681	0.50176
				0.73462	0.11725	0.03
				0.0643	0.47628	0.27358
				0.13386	0.011648	0.01
				0.17685	0.46544	0.02
				0.17778	0.243825	0.20916
				0.12841	0.02742	0.4748
				0.18	0.42541	0.19758
				0.05	0.17577	0.0123
				0.10897	0.12337	0.31249
				0.2373	0.36646	0.28077
				0.45006	0.38007	0.53396
				0.56409	0.19638	0.4776
				0.03	0.18528	0.187
				0.32025	0.06527	0.28937
				0.23	0.13748	0.34554
				0.2514	0.0553	0.43937
				0.13486	0.62349	0.89863
				0.69937	0.037	0.90226
				0.06	0.07093	0.50176
				0.18892	0.00237	0.81108
				0.05	0.01598	0.43937
				0.1	0.01731	0.54105
				0.47382	0.004
				0.2069	0.04
				0.4105	0.09
				0.245	0.05
				0.32231	0.05647
				0.0547	0.20251
				0.0113	0.23402
				0.075	0.26524
					0.07658
					0.05
					0.39437
					0.29061
					0.44341
					0.19799
					0.26993
					0.25869
					0.08
					0.134
					0.4051
					0.21319
					0.51435
					0.409007
					0.12205
					0.70287
					0.31776
					0.40098
					0.31768
					0.36767
					0.44732
					0.45358
					0.16611
					0.3989

## Sheet: F
			Mean PCC
			Untreated	Heat shock	MMS treated
			0.308264	0.323047	0.306099
			0.263911	0.284421	0.287956
			0.22808	0.213655	0.333992
