# Supplementary material for: Evidence of centromeric histone 3 chaperone involved in DNA damage repair pathway in budding yeast
Source: eLife. 2025 Dec 10;14:e104431. doi: 10.7554/eLife.104431 (PMC12695027; doi:10.7554/eLife.104431)
Supplement: Figure 4—source data 1. [file elife-104431-fig4-data1.xlsx]

## Sheet: 4B
			PCC values Rad52- Scm3
			no mms	0.02% MMS
			0.58397	0.21741
			0.41676	0.22265
			0.14887	0.26823
			0.48126	0.7098
			0.57019	0.9252
			0.44619	0.59971
			0.43087	0.58131
			0.40421	0.41508
			0.604	0.1833
			0.15947	0.79252
			0.28534	0.81464
			0.30619	0.40879
			0.07354	0.45968
			0.14431	0.71625
			0.3649	0.49816
			0.20482	0.25199
			0.63397	0.47117
			0.111222	0.53865
			0.3948	0.75
			0.3011	0.62299
			0.2082	0.53033
			0.49054	0.39954
			0.02987	0.33039
			0.26217	0.414
			0.58299	0.66617
			0.72611	0.44992
			0.53998	0.48634
			0.49075	0.43713
			0.28381	0.16582
			0.62594	0.11545
			0.58368	0.53428
			0.23254	0.4291
			0.02345	0.31362
			0.5356	0.35333
			0.59902	0.33174
			0.49719	0.40222
			0.346	0.42044
			0.26529	0.6207
			0.43457	0.22006
			0.13409	0.55002
			0.11913	0.28613
			0.44456	0.4036
			0.64036	0.62852
			0.45885	0.66262
			0.45804	0.60103
			0.14299	0.50145
			0.692	0.52195
			0.19899	0.62175
			0.4144	0.38605
			0.4814	0.46119
			0.73277	0.34178
			0.25576	0.502
			0.41813	0.58071
			0.42731	0.21432
			0.28443	0.59786
			0.689	0.59855
			0.297	0.24243
			0.03	0.583
			0.024	0.14551
			0.21849	0.56919
			0.09	0.38689
			0.46142	0.20859
			0.088	0.47885
			0.17632	0.39612
			0.11459
			0.15407

## Sheet: 4C
		PCC values Rad52- Scm3
		Untreated			Treated
		0.24235	0.204564	0.276372	0.489229	0.630537	0.581948

## Sheet: 4E
			PCC values yH2A- Scm3
			PCC values
			no mms	0.02% MMS
			0.02844	0.38825
			0.13431	0.3482
			0.05953	0.69857
			0.03	0.69052
			0.06	0.68433
			0.58516	0.68353
			0.36628	0.68266
			0.33318	0.6819
			0.0533	0.67429
			0.17638	0.6666
			0.15035	0.66325
			0.20555	0.64846
			0.15241	0.4817
			0.30059	0.46077
			0.3615	0.46044
			0.32141	0.45211
			0.17154	0.23622
			0.41555	0.22062
			0.0303	0.21401
			0.31254	0.11963
			0.20879	0.11775
			0.26378	0.87534
			0.65193	0.82517
			0.44358	0.82242
			0.0655	0.80195
			0.23654	0.79276
			0.16137	0.79257
			0.14629	0.77625
			0.19723	0.77388
			0.11492	0.42448
			0.57952	0.41499
			0.17839	0.41262
			0.2772	0.39188
			0.11723	0.33601
			0.09	0.33497
			0.13852	0.30412
			0.12	0.77283
			0.34856	0.77227
			0.09	0.76968
			0.191925	0.76876
			0.175642	0.20713
			0.48548	0.64772
			0.37118	0.63406
			0.18635	0.74102
			0.09	0.74002
			0.13857	0.35053
			0.13852	0.62962
			0.10564	0.60844
			0.46672	0.60199
			0.25736	0.59754
			0.55058	0.59707
			0.08	0.58482
			0.37854	0.55564
			0.08	0.54943
			0.58299	0.54921
			0.02	0.54641
			0.21163	0.54275
			0.41762	0.53571
			0.5053	0.52448
			0.70093	0.52388
			0.18258	0.51908
			0.16825	0.51125
			0.26349	0.49494
			0.1247	0.49071
			0.29681	0.48331
			0.15377	0.48319
			0.37075	0.76417
			0.024	0.75055
				0.74635
				0.74168
				0.72801
				0.70184

## Sheet: 4F
								PCC values y-H2A- Scm3
								Untreated			Treated
								0.24235	0.204564	0.276372	0.489229	0.630537	0.581948
