# Supplementary material for: Evidence of centromeric histone 3 chaperone involved in DNA damage repair pathway in budding yeast
Source: eLife. 2025 Dec 10;14:e104431. doi: 10.7554/eLife.104431 (PMC12695027; doi:10.7554/eLife.104431)
Supplement: Figure 5—figure supplement 1—source data 3. [file elife-104431-fig5-figsupp1-data3.xlsx]

## Sheet: B
			Hours	% cut remaining
			0	100	100
			1	65.2681	53.4885
			2	29.1599	18.645
			3	64.7602	42.1105
			4	95.6878	93.98

## Sheet: C
				CEN3 enrichment
			hours	Scm3		Rad51
			0	0.50698	0.659754	0.076415	0.137738
			1	0.50698	0.852635	0.020193	0.0813339
			2	0.587771	0.659754	0.0486978	0.0921418
			3	0.426317	0.41466	0.0438889	0.157127
			4	0.574349	1.31951	0.102949	0.102949

## Sheet: D
		Enrichment at CEN3 locus
	Hours	0	1	2	3	4
		0.50698	0.50698	0.587771	0.426317	0.574349
		0.659754	0.852635	0.659754	0.41466	1.31951

## Sheet: E
					Enrichment at TUB2 locus
				Hours	0	1	2	3	4
					0.00666121	0.0099575	0.0231957	0.0113592	0.00028833
					0.00494436	0.00916277	0.0571145	0.0195052	0.0193704

## Sheet: F
				Rad51 ChIP
			hours	Near DSB		-1 Kb		-2kb		-3kb		TUB2
			0	0.0994421	0.0669858	0.0813339	0.0656073	0.0960547	0.0836205	0.0733022	0.0679209	0.00030689	0.0679209
			1	0.151774	0.174343	0.150726	0.332171	0.228458	0.211686	0.145592	0.144586	0.0559391	0.0188407
			2	0.336808	0.366021	0.271684	0.510506	0.444421	0.554785	0.25349	0.486327	0.0361465	0.0656073
			3	0.307786	0.351111	0.234881	0.450625	0.476319	0.493116	0.329877	0.395021	0.047039	0.0432847
			4	0.0934281	0.157127	0.0994421	0.184284	0.118257	0.173139	0.0791098		0.0103804	0.0109722
