# Supplementary material for: Evidence of centromeric histone 3 chaperone involved in DNA damage repair pathway in budding yeast
Source: eLife. 2025 Dec 10;14:e104431. doi: 10.7554/eLife.104431 (PMC12695027; doi:10.7554/eLife.104431)
Supplement: Figure 5—figure supplement 2—source data 3. [file elife-104431-fig5-figsupp2-data3.xlsx]

## Sheet: B
						% cut remaining
					Hours	SCM3			SCM3-AID
					0	100	100		100	100
					1	45.8004	23.9492		47.1729	39.5259
					2	12.5063	7.80606		19.5177	2.8511
					3	37.7663	31.1782		30.4637	14.3306
					4	52.8929	45.0976		25.7784	10.9772
					5	58.0247	57.4182		26.927	8.25834
					6	97.5495	111.454		68.3916	56.3642
