# Supplementary material for: Evidence of centromeric histone 3 chaperone involved in DNA damage repair pathway in budding yeast
Source: eLife. 2025 Dec 10;14:e104431. doi: 10.7554/eLife.104431 (PMC12695027; doi:10.7554/eLife.104431)
Supplement: Figure 5—source data 3. [file elife-104431-fig5-data3.xlsx]

## Sheet: 5C
					Scm3 enrichment
				hours	Near DSB		-1 Kb		-2kb		-3kb		TUB2
				0	0.00647906	0.00552427	0.00461325	0.00515433	0.0044871	0.00571908	0.00442533	0.00477594	0.00666121	0.00494436
				1	0.0376815	0.0204749	0.0332616	0.0266448	0.0177013	0.017579	0.01418	0.0107464	0.0099575	0.00916277
				2	0.104386	0.098073	0.0612138	0.0688691	0.0758872	0.0575117	0.0620683	0.0679209	0.0231957	0.0571145
				3	0.0607909	0.0625	0.0743254	0.049721	0.0511189	0.0418102	0.0415214	0.0415214	0.0113592	0.0195052
				4	0.0236831	0.0246888	0.0192366	0.0245182	0.0240137	0.0268302	0.0227183		0.00028833	0.0193704

## Sheet: 5D
					- Ab enrichment
				hours	Near DSB		-1 Kb		-2kb		-3kb		TUB2
				0	0.0064343	0.0248605	0.00433426	0.0193704	0.00418662	0.0178244	0.00278135	0.00684848	0.00643432	0.0107464
				1	0.0044871	0.015625	0.00666121	0.0245182	0.00374713	0.0169802	0.00393342	0.0150928	0.00235509	0.0178244
				2	0.00387927	0.020193	5.4628e-05	0.00100095	0.00312918	0.0209051	0.00352051	0.017579	0.0230355	0.0180732
				3	0.0124055	0.0241942	0.0132616	0.0332616	0.0189559	0.0125167	0.0103955	0.0303955	0.0171627	0.0341967
				4	0.0103804	0.0207607	0.0117597	0.0268302	0.0115978	0.0277763	0.0246888	0.0246888	0.0230355	0.0252075
