# Supplementary material for: Evidence of centromeric histone 3 chaperone involved in DNA damage repair pathway in budding yeast
Source: eLife. 2025 Dec 10;14:e104431. doi: 10.7554/eLife.104431 (PMC12695027; doi:10.7554/eLife.104431)
Supplement: Figure 6—figure supplement 1—source data 3. [file elife-104431-fig6-figsupp1-data3.xlsx]

## Sheet: C
			WT + MMS			scm3 + MMS
		Rad53-p intensities	1.02351	0.932951	0.845849	0.574271	0.248096	0.290924

## Sheet: D
						% of metaphase cells
					Mins	cdc20	scm3
					0	0.990099	1.04167
					30	1.86916	3.40136
					60	8.77193	11.1111
					120	10.1266	15.4696
					180	10.8108	17.0732
					240	5.55556	19.3182

## Sheet: E
					% of multibudded cells
				Mins	cdc20	scm3
				0	77.2475	79.1667
				30	82.3077	85.034
				60	78.0822	84.7222
				120	82.2785	76.7956
				180	81.0811	67.3171
				240	80.5556	68.1818
