# Supplementary material for: Evidence of centromeric histone 3 chaperone involved in DNA damage repair pathway in budding yeast
Source: eLife. 2025 Dec 10;14:e104431. doi: 10.7554/eLife.104431 (PMC12695027; doi:10.7554/eLife.104431)
Supplement: Figure 6—source data 3. [file elife-104431-fig6-data3.xlsx]

## Sheet: 6C
						mad2∆ + MMS			scm3			scm3 + MMS			scm3 mad2∆			scm3 mad2∆ + MMS
					Multi budded cells	3.0303	1.83486	2.35294	15.1261	11.1111	11.6667	16.8421	20.7547	21.9512	35.9223	30.7692	30	41.791	43.8596	46.4286

## Sheet: 6E
				% of anaphase cells
			Mins	mad2∆	mad2∆ scm3
			0	0.970874	0
			30	1.86916	0.952381
			60	6.79612	0.909091
			120	0	9.09091
			180	4	19.802
			240	6.93069	35.3535
