# Supplementary material for: Evidence of centromeric histone 3 chaperone involved in DNA damage repair pathway in budding yeast
Source: eLife. 2025 Dec 10;14:e104431. doi: 10.7554/eLife.104431 (PMC12695027; doi:10.7554/eLife.104431)
Supplement: Figure 7—figure supplement 1—source data 3. [file elife-104431-fig7-figsupp1-data3.xlsx]

## Sheet: A
			hours	0			1			2			3
			p-Scm3/Scm3	0.454204	0.299141	0.450263	0.564306	0.699851	0.734575	0.912348	1.11348	1.27833	0.861697	1.59059	1.51805

## Sheet: A-2
											Relative intensities
										hours	p-Scm3
										0	0.571978	0.585102
										1	1.02764	0.79558
										2	1.44496	0.979521
										3	3.09701	3.92668

## Sheet: WT
			% of cells
		mins	G1	S	M	A
		0	94.3925	0	0	5.60748
		30	22.7273	77.2727	0	0
		60	9.40171	19.6581	70.9402	0
		90	12.5	12.5	50	25
		120	4.7619	9.52381	11.9048	73.8095

## Sheet: MMS
				% of cells
			mins	G1	S	M	A
			0	95.6044	2.1978	0	2.1978
			30	57.7778	38.8889	0	3.33333
			60	13.3333	86.6667	0	0
			90	10.6061	25.7576	63.6364	0
			120	7.14286	4.7619	83.3333	4.7619
