# Supplementary material for: Evidence of centromeric histone 3 chaperone involved in DNA damage repair pathway in budding yeast
Source: eLife. 2025 Dec 10;14:e104431. doi: 10.7554/eLife.104431 (PMC12695027; doi:10.7554/eLife.104431)
Supplement: Figure 7—source data 3. [file elife-104431-fig7-data3.xlsx]

## Sheet: 7A
					MMS %	p-Scm3 relative intensities
					0%	0.433111	0.579867
					0.01%	0.562866	0.627597
					0.02%	0.846461	0.768231
					0.1%	1.36009	1.40497

## Sheet: 7A-2
						0%		0.01%		0.02%		0.1%
					p-Scm3/Scm3	0.346251	0.419426	0.441729	0.626585	0.743915	0.873117	0.901029	1.07146
